# Supplementary material for: Pandemic Publishing: Medical journals drastically speed up their publication process for Covid-19
Source: bioRxiv or medRxiv preprint supplement (doi:10.1101/2020.04.18.045963), 2020-04-18
Supplement: Supplementary file [file media-1.pdf]

## Supplementary file A

### List of journals publishing most Covid-19 related articles

| Journal title                    | number of articles | Articles in 2020 | Info on dates    |
|----------------------------------|--------------------|------------------|------------------|
| Journal of Virology              | 2485               |                  | 4 available      |
| PLoS ONE                         | 1567               |                  | 14 available     |
| Virology                         | 861                |                  | 8 available      |
| Emerging Infectious Diseases     | 810                |                  | 72 not available |
| The Lancet                       | 620                | 116              | not available    |
| Viruses                          | 568                | 38               | available        |
| Archives of Virology             | 518                | 9                | available        |
| Scientific Reports               | 492                | 14               | available        |
| Vaccine                          | 484                | 6                | available        |
| Journal of Clinical Microbiology | 476                | 3                | available        |
| Virus Research                   | 475                | 10               | available        |
| Veterinary Microbiology          | 444                | 8                | available        |

Journals with data on dates available were selected.

## List of journals publishing most Covid-19 related articles since the outbreak of the pandemic

| Journal title                                | number of articles | Articles in 2020 | Info on dates |
|----------------------------------------------|--------------------|------------------|---------------|
| The BMJ                                      | 350                | 174              | not available |
| Science                                      | 162                | 142              | not available |
| The Lancet                                   | 620                | 116              | not available |
| Nature                                       | 256                | 111              | not available |
| Journal of Medical Virology                  | 97                 | 84               | available     |
| The Lancet Infectious Diseases               | 367                | 76               | not available |
| The New Scientist                            | 100                | 73               | not available |
| Emerging Infectious Diseases                 | 810                | 72               | not available |
| JAMA                                         | 68                 | 62               | not available |
| New England Journal of Medicine              | 72                 | 57               | not available |
| Case Medical Research                        | 56                 | 56               | not available |
| Journal of Infection                         | 146                | 45               | not available |
| Travel Medicine and Infectious Disease       | 121                | 45               | available     |
| Eurosurveillance                             | 71                 | 41               | available     |
| Viruses                                      | 568                | 38               | available     |
| Chinese Medical Journal                      | 49                 | 38               | not available |
| International Journal of Infectious Diseases | 260                | 33               | available     |
| 中华结核和呼吸杂志                                    | 32                 | 32               | not available |
| Journal of Hospital Infection                | 172                | 26               | available     |

Journals with data on dates available were selected.
